# Supplementary material for: A NIR fluorescent probe for detection of viscosity and lysosome imaging in live cells
Source: Royal Society of Chemistry journal article supplement (doi:10.1039/c9ob01222b), 2019-01-01
Supplement: c9ob01222b1.pdf [file c9ob01222b1.pdf]

## Supporting Information

### **NIR fluorescent Probe for Detection of Viscosity and lysosome imaging in live cells**

Tong Chen<sup>a</sup>, Zikang Chen<sup>b</sup>, Ruiyuan Liu<sup>b\*</sup>, Shaobing Zheng<sup>a\*</sup>

<sup>a</sup> *Department of Urology, Nanfang Hospital, Southern Medical University, Guangzhou, 510515, P.R. China.*

<sup>b</sup> *Biomaterials Research Center, School of Biomedical Engineering, Southern Medical University, Guangzhou 510515, P.R. China.*

*#Corresponding author:*

*Ruiyuan Liu, Ph.D, Biomaterials Research Center, School of Biomedical Engineering, Southern Medical University, Guangzhou, 510515, P.R. China. E-mail: ruiyliu@smu.edu.cn;*

*Shaobing Zheng, Ph.D, Department of Urology, Nanfang Hospital, Southern Medical University, Guangzhou, 510515, P.R. China, Email: uro@fimmu.com*

## Content

Fig. S1.  $^1\text{H}$  NMR spectrum of Lyo-BTC in  $\text{CDCl}_3$

Fig. S2.  $^{13}\text{C}$  NMR spectrum of Lyo-BTC in  $\text{CDCl}_3$

Fig. S3. IR spectrum of Lyo-BTC

Fig. S4. ESI-MS spectrum of Lyo-BTC

Fig. S5 UV-spectra of Lyso-BTC in DMSO/glycerol mixed solvents

Fig. S6 (A) Fluorescence spectra of Lyso-BTC at different pH conditions ( $10\ \mu\text{M}$ ,  $\text{Ex} = 505\ \text{nm}$ ). (B) Fluorescence intensity of Lyso-BTC at different pH at  $685\ \text{nm}$  ( $10\ \mu\text{M}$ ,  $\text{Ex} = 505\ \text{nm}$ ).

Fig. S7 Mulliken charge densities numbering on atoms of Lyso-BTC. The values of charges on N1, N2 and N3 are  $-0.543$ ,  $-0.520$  and  $-0.512$  respectively.

Fig. S8 (A) Fluorescent spectra of Lyso-BTC in DMSO/glycerol mixtures with different viscosity. (B) Dependence between  $\text{Log}(I_{\text{max}})$  and  $\text{Log}(\text{viscosity})$ .

Fig. S9 (a) Photostability of Lyso-BTC compare with Lyso-Tracker Green under continuous scanning at  $488\ \text{nm}$ . (b) Photostability of Lyso-BTC and Lyso-Tracker Green under continuous scanning at  $488\ \text{nm}$ , where  $I_0$  is the initial fluorescence intensity and  $I$  is the fluorescence intensity of each sample at various time points.

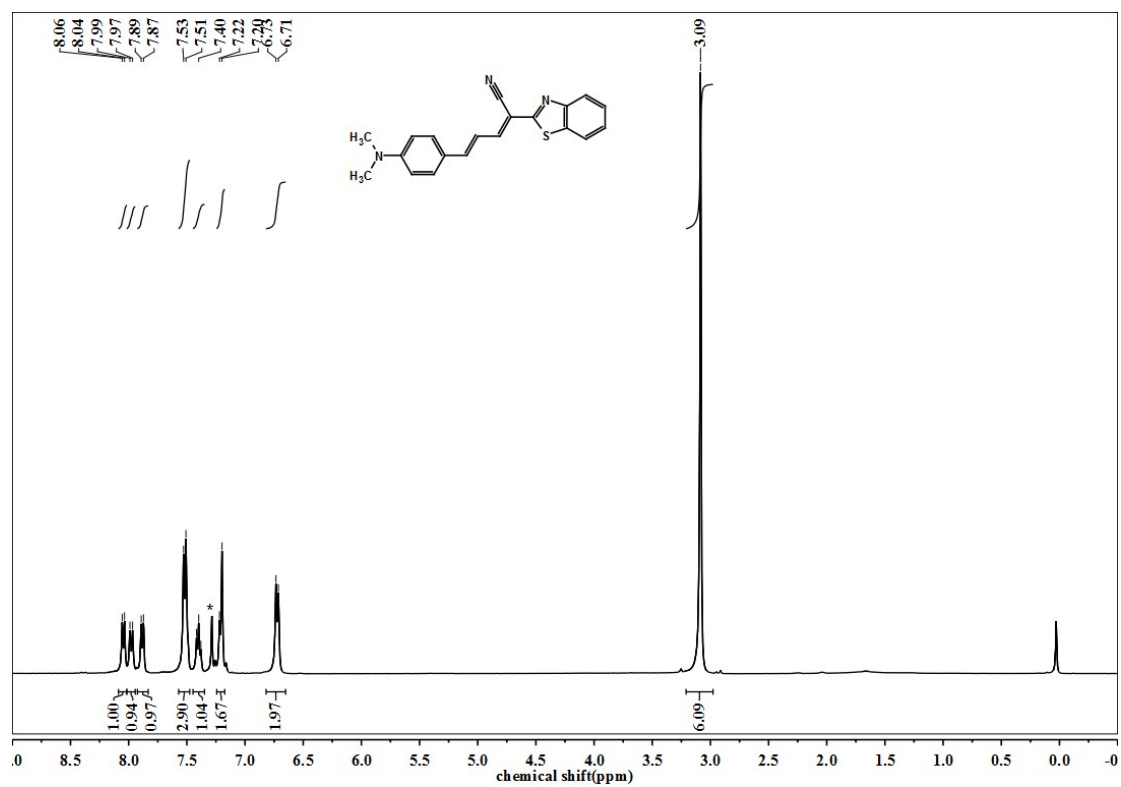

Fig. S1.  $^1\text{H}$  NMR spectrum of Lyo-BTC in  $\text{CDCl}_3$

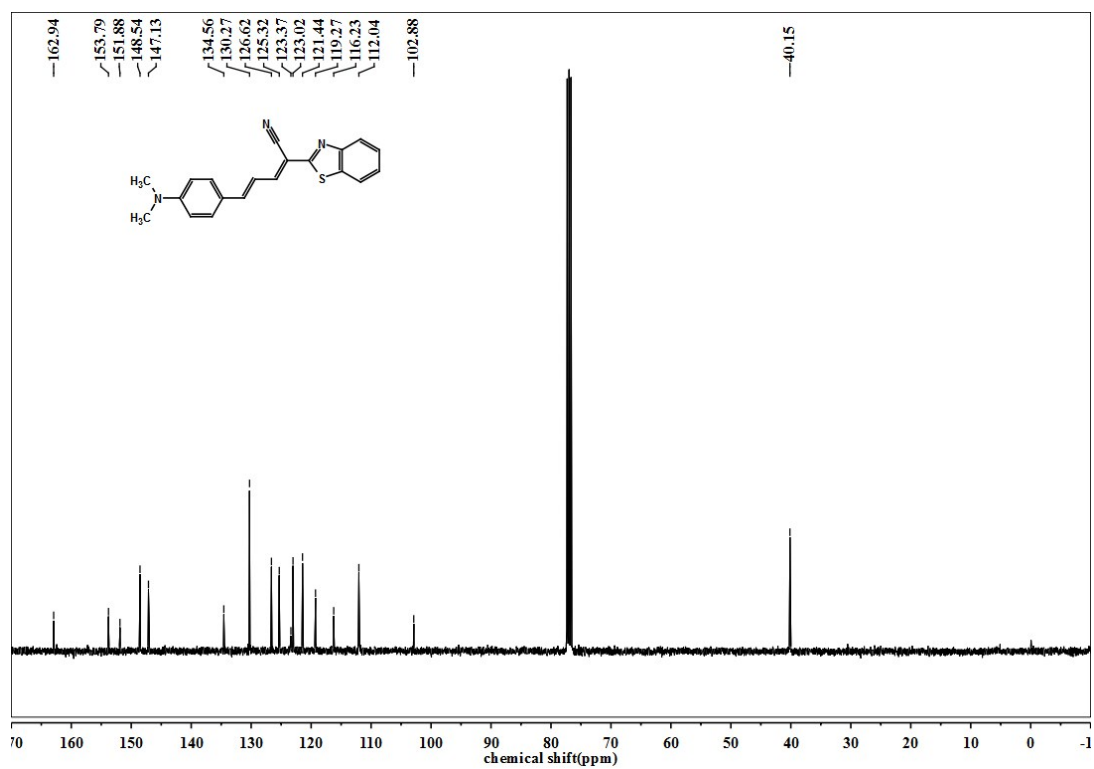

Fig. S2.  $^{13}\text{C}$  NMR spectrum of Lyo-BTC in  $\text{CDCl}_3$

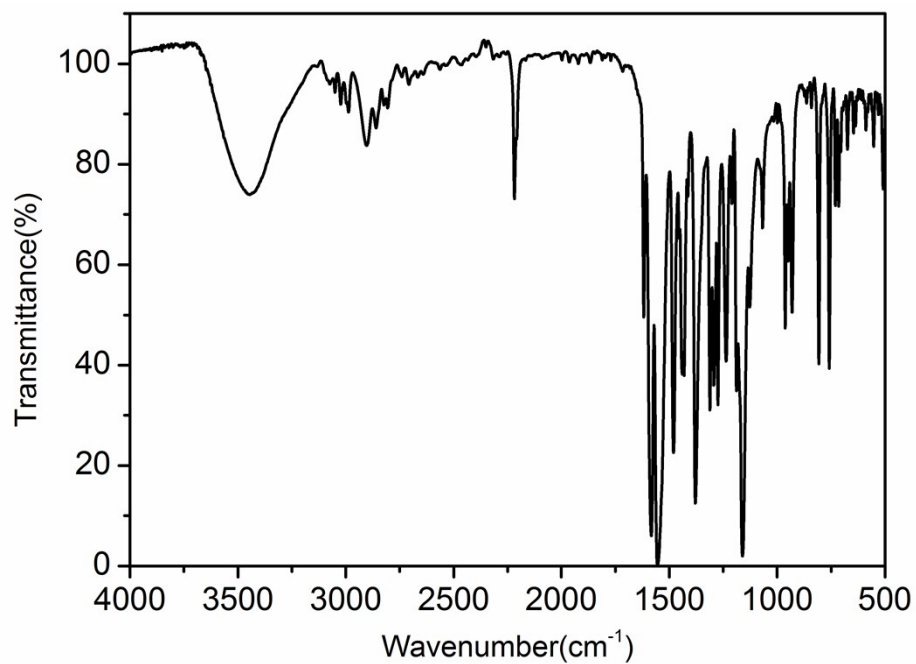

Fig. S3. IR spectrum of Lyo-BTC

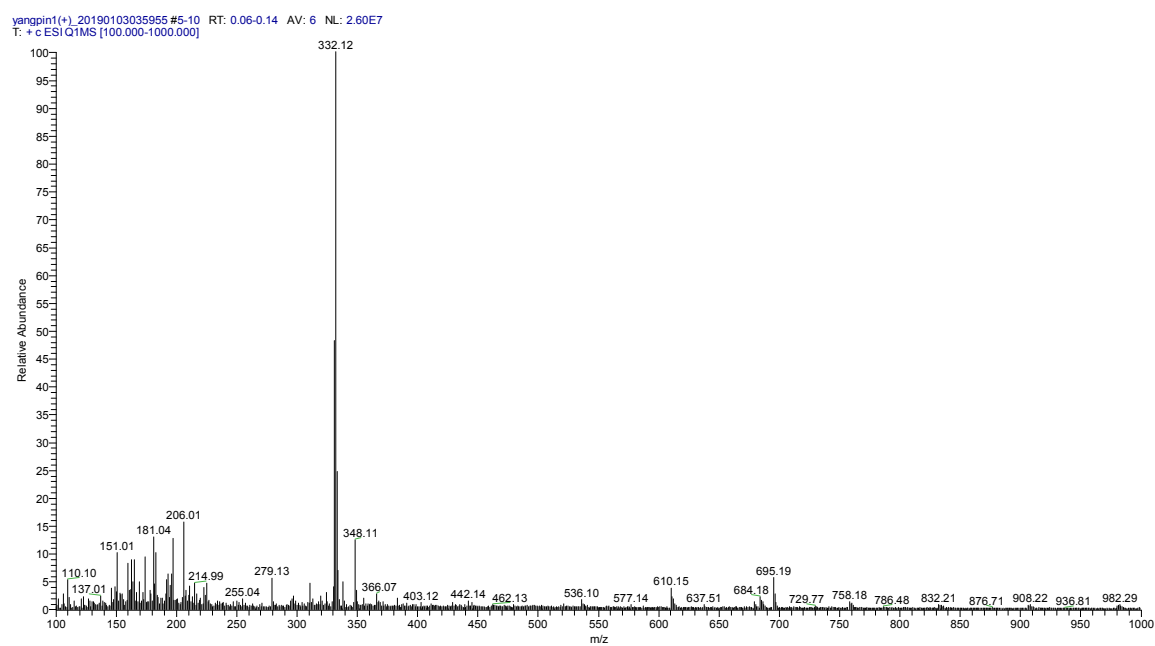

Figure S4. MS spectrum of Lyo-BTC

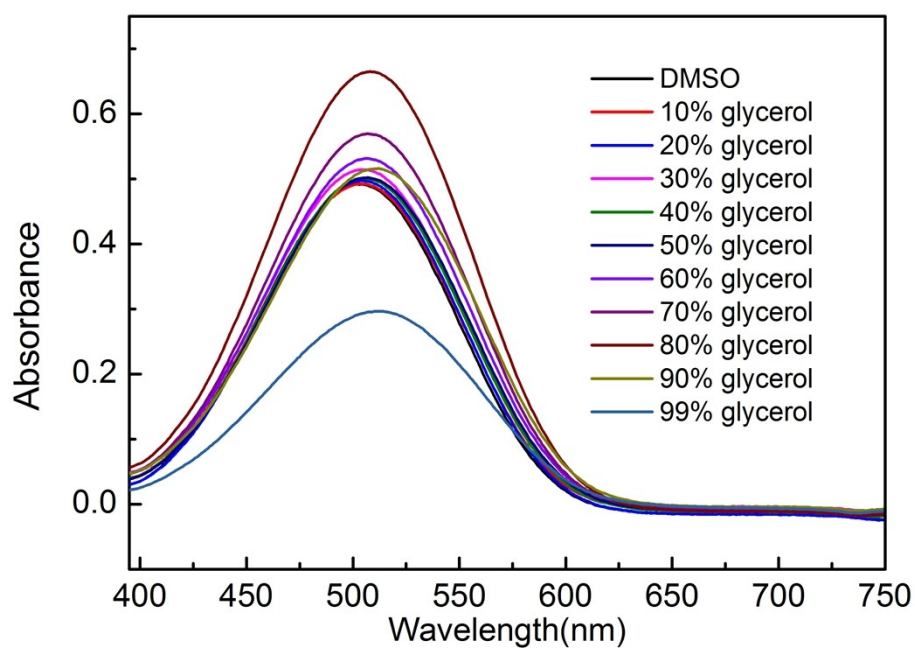

Fig. S5 UV-spectra of Lyso-BTC in DMSO/glycerol mixed solvents

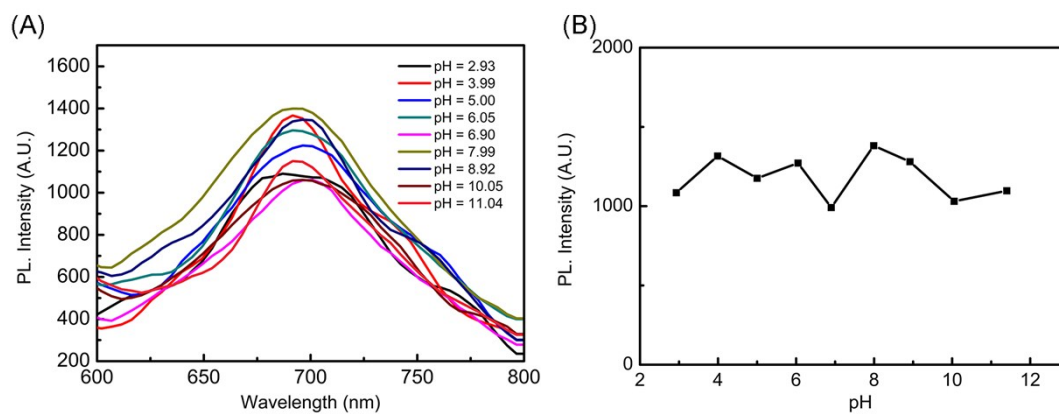

Fig. S6 (A) Fluorescence spectra of Lyso-BTC at different pH conditions (10  $\mu$ M, Ex = 505 nm).

(B) Fluorescence intensity of Lyso-BTC at different pH at 685 nm (10  $\mu$ M, Ex = 505 nm).

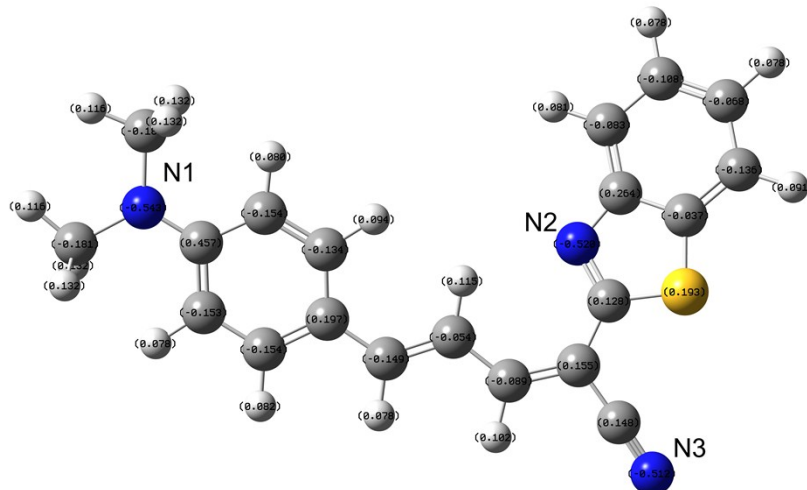

Fig S7. Mulliken charge densities numbering on atoms of Lyso-BTC. The values of charges on N1, N2 and N3 are -0.543, -0.520 and -0.512 respectively.

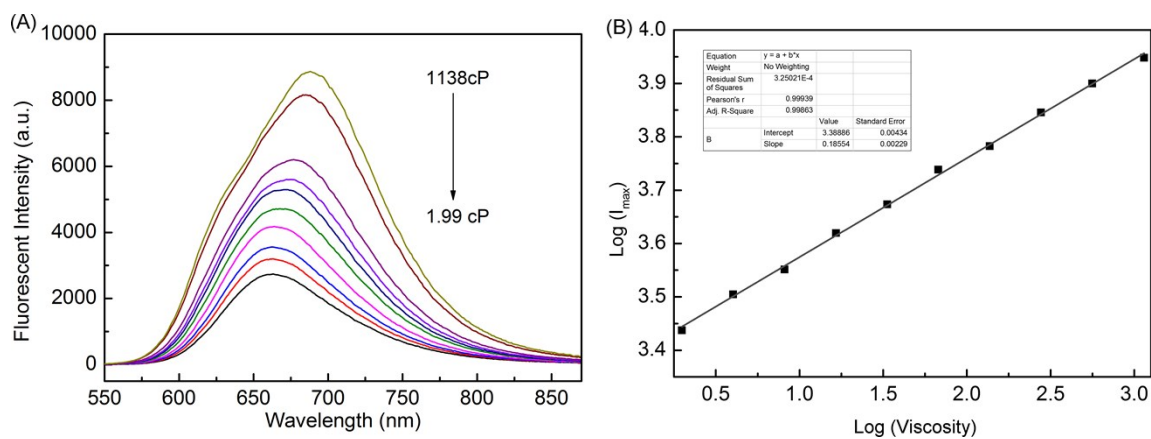

Fig. S8 (A) Fluorescent spectra of Lyso-BTC in DMSO/glycerol mixtures with different viscosity. (B) Dependence between Log ( $I_{max}$ ) and Log (viscosity).

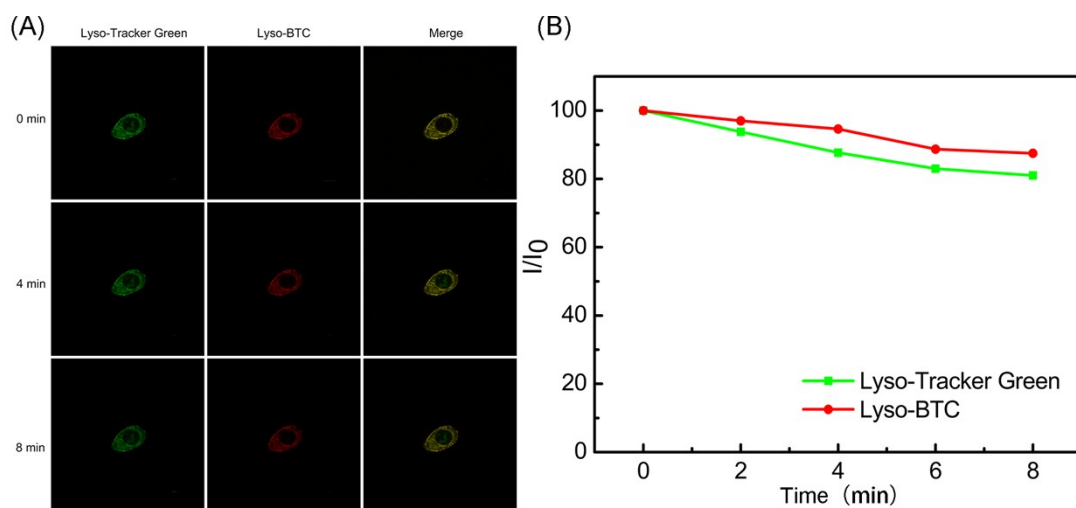

Fig. S9 (A) Photostability of Lyso-BTC compare with Lyso-Tracker Green under continuous scanning at 488 nm. (B) Photostability of Lyso-BTC and Lyso-Tracker Green under continuous scanning at 488 nm, where  $I_0$  is the initial fluorescence intensity and  $I$  is the fluorescence intensity of each sample at various time points.
